# Supplementary material for: Identification of a novel DNA aptamer that selectively targets lung cancer serum
Source: Royal Society of Chemistry journal article supplement (doi:10.1039/d1ra06233f), 2021-01-01
Supplement: d1ra06233f1.pdf [file d1ra06233f1.pdf]

Table S-1. List of serum samples used in this study.

| <b>ID</b> | <b>Clinical status</b> |
|-----------|------------------------|
| N1        | Healthy control        |
| N2        | Healthy control        |
| N3        | Healthy control        |
| N4        | Healthy control        |
| N5        | Healthy control        |
| N6        | Healthy control        |
| N7        | Healthy control        |
| N8        | Healthy control        |
| N9        | Healthy control        |
| N10       | Healthy control        |
| N11       | Healthy control        |
| N12       | Healthy control        |
| N13       | Healthy control        |
| N14       | Healthy control        |
| N15       | Healthy control        |
| N16       | Healthy control        |
| N17       | Healthy control        |
| N18       | Healthy control        |
| N19       | Healthy control        |
| N20       | Healthy control        |
| N21       | Healthy control        |
| N22       | Healthy control        |
| N23       | Healthy control        |
| N24       | Healthy control        |
| N25       | Healthy control        |
| N26       | Healthy control        |
| N27       | Healthy control        |
| N28       | Healthy control        |
| N29       | Healthy control        |
| N30       | Healthy control        |
| N31       | Healthy control        |
| N32       | Healthy control        |
| N33       | Healthy control        |
| N34       | Healthy control        |
| N35       | Healthy control        |
| N36       | Healthy control        |
| N37       | Healthy control        |
| N38       | Healthy control        |
| N39       | Healthy control        |
| N40       | Healthy control        |
| N41       | Healthy control        |

|     |                 |
|-----|-----------------|
| N42 | Healthy control |
| N43 | Healthy control |
| N44 | Healthy control |
| N45 | Healthy control |
| N46 | Healthy control |
| N47 | Healthy control |
| N48 | Healthy control |
| N49 | Healthy control |
| N50 | Healthy control |
| N51 | Healthy control |
| N52 | Healthy control |
| N53 | Healthy control |
| N54 | Healthy control |
| N55 | Healthy control |
| N56 | Healthy control |
| N57 | Healthy control |
| N58 | Healthy control |
| N59 | Healthy control |
| N60 | Healthy control |
| N61 | Healthy control |
| N62 | Healthy control |
| N63 | Healthy control |
| N64 | Healthy control |
| N65 | Healthy control |
| N66 | Healthy control |
| N67 | Healthy control |
| N68 | Healthy control |
| N69 | Healthy control |
| N70 | Healthy control |
| N71 | Healthy control |
| N72 | Healthy control |
| N73 | Healthy control |
| N74 | Healthy control |
| N75 | Healthy control |
| N76 | Healthy control |
| N77 | Healthy control |
| N78 | Healthy control |
| N79 | Healthy control |
| N80 | Healthy control |
| N81 | Healthy control |
| N82 | Healthy control |
| N83 | Healthy control |
| N84 | Healthy control |
| N85 | Healthy control |

|       |                 |
|-------|-----------------|
| N86   | Healthy control |
| N87   | Healthy control |
| N88   | Healthy control |
| N89   | Healthy control |
| N90   | Healthy control |
| N91   | Healthy control |
| N92   | Healthy control |
| N93   | Healthy control |
| N94   | Healthy control |
| N95   | Healthy control |
| N96   | Healthy control |
| N97   | Healthy control |
| N98   | Healthy control |
| N99   | Healthy control |
| N100  | Healthy control |
| LC-1  | Lung cancer     |
| LC-2  | Lung cancer     |
| LC-3  | Lung cancer     |
| LC-4  | Lung cancer     |
| LC-5  | Lung cancer     |
| LC-6  | Lung cancer     |
| LC-7  | Lung cancer     |
| LC-8  | Lung cancer     |
| LC-9  | Lung cancer     |
| LC-10 | Lung cancer     |
| LC-11 | Lung cancer     |
| LC-12 | Lung cancer     |
| LC-13 | Lung cancer     |
| LC-14 | Lung cancer     |
| LC-15 | Lung cancer     |
| LC-16 | Lung cancer     |
| LC-17 | Lung cancer     |
| LC-18 | Lung cancer     |
| LC-19 | Lung cancer     |
| LC-20 | Lung cancer     |
| LC-21 | Lung cancer     |
| LC-22 | Lung cancer     |
| LC-23 | Lung cancer     |
| LC-24 | Lung cancer     |
| LC-25 | Lung cancer     |
| LC-26 | Lung cancer     |
| LC-27 | Lung cancer     |
| LC-28 | Lung cancer     |
| LC-29 | Lung cancer     |

|       |             |
|-------|-------------|
| LC-30 | Lung cancer |
| LC-31 | Lung cancer |
| LC-32 | Lung cancer |
| LC-33 | Lung cancer |
| LC-34 | Lung cancer |
| LC-35 | Lung cancer |
| LC-36 | Lung cancer |
| LC-37 | Lung cancer |
| LC-38 | Lung cancer |
| LC-39 | Lung cancer |
| LC-40 | Lung cancer |
| LC-41 | Lung cancer |
| LC-42 | Lung cancer |
| LC-43 | Lung cancer |
| LC-44 | Lung cancer |
| LC-45 | Lung cancer |
| LC-46 | Lung cancer |
| LC-47 | Lung cancer |
| LC-48 | Lung cancer |
| LC-49 | Lung cancer |
| LC-50 | Lung cancer |
| LC-51 | Lung cancer |
| LC-52 | Lung cancer |
| LC-53 | Lung cancer |
| LC-54 | Lung cancer |
| LC-55 | Lung cancer |
| LC-56 | Lung cancer |
| LC-57 | Lung cancer |
| LC-58 | Lung cancer |
| LC-59 | Lung cancer |
| LC-60 | Lung cancer |
| LC-61 | Lung cancer |
| LC-62 | Lung cancer |
| LC-63 | Lung cancer |
| LC-64 | Lung cancer |
| LC-65 | Lung cancer |
| LC-66 | Lung cancer |
| LC-67 | Lung cancer |
| LC-68 | Lung cancer |
| LC-69 | Lung cancer |
| LC-70 | Lung cancer |
| LC-71 | Lung cancer |
| LC-72 | Lung cancer |
| LC-73 | Lung cancer |

|        |                   |
|--------|-------------------|
| LC-74  | Lung cancer       |
| LC-75  | Lung cancer       |
| LC-76  | Lung cancer       |
| LC-77  | Lung cancer       |
| LC-78  | Lung cancer       |
| LC-79  | Lung cancer       |
| LC-80  | Lung cancer       |
| LC-81  | Lung cancer       |
| LC-82  | Lung cancer       |
| LC-83  | Lung cancer       |
| LC-84  | Lung cancer       |
| LC-85  | Lung cancer       |
| LC-86  | Lung cancer       |
| LC-87  | Lung cancer       |
| LC-88  | Lung cancer       |
| LC-89  | Lung cancer       |
| LC-90  | Lung cancer       |
| LC-91  | Lung cancer       |
| LC-92  | Lung cancer       |
| LC-93  | Lung cancer       |
| LC-94  | Lung cancer       |
| LC-95  | Lung cancer       |
| LC-96  | Lung cancer       |
| LC-97  | Lung cancer       |
| LC-98  | Lung cancer       |
| LC-99  | Lung cancer       |
| LC-100 | Lung cancer       |
| GC-1   | Gastric cancer    |
| GC-2   | Gastric cancer    |
| GC-3   | Gastric cancer    |
| GC-4   | Gastric cancer    |
| GC-5   | Gastric cancer    |
| GC-6   | Gastric cancer    |
| GC-7   | Gastric cancer    |
| GC-8   | Gastric cancer    |
| GC-9   | Gastric cancer    |
| GC-10  | Gastric cancer    |
| CC-1   | Colorectal cancer |
| CC-2   | Colorectal cancer |
| CC-3   | Colorectal cancer |
| CC-4   | Colorectal cancer |
| CC-5   | Colorectal cancer |
| CC-6   | Colorectal cancer |
| CC-7   | Colorectal cancer |

|        |                          |
|--------|--------------------------|
| CC-8   | Colorectal cancer        |
| CC-9   | Colorectal cancer        |
| CC-10  | Colorectal cancer        |
| HCC-1  | Hepatocellular carcinoma |
| HCC-2  | Hepatocellular carcinoma |
| HCC-3  | Hepatocellular carcinoma |
| HCC-4  | Hepatocellular carcinoma |
| HCC-5  | Hepatocellular carcinoma |
| HCC-6  | Hepatocellular carcinoma |
| HCC-7  | Hepatocellular carcinoma |
| HCC-8  | Hepatocellular carcinoma |
| HCC-9  | Hepatocellular carcinoma |
| HCC-10 | Hepatocellular carcinoma |

Table S-2. Specicity test of the  $\Delta C_t$  value of those tumor sera

| ID    | Clinical status          | $\Delta C_t$ value |
|-------|--------------------------|--------------------|
| GC-1  | Gastric cancer           | 0.25               |
| GC-2  | Gastric cancer           | 0.35               |
| GC-3  | Gastric cancer           | 0.5                |
| GC-4  | Gastric cancer           | 0.45               |
| GC-5  | Gastric cancer           | 0.36               |
| GC-6  | Gastric cancer           | 0.14               |
| GC-7  | Gastric cancer           | 0.39               |
| GC-8  | Gastric cancer           | 0.36               |
| GC-9  | Gastric cancer           | 0.12               |
| GC-10 | Gastric cancer           | 0.11               |
| CC-1  | Colorectal cancer        | 0.25               |
| CC-2  | Colorectal cancer        | 0.45               |
| CC-3  | Colorectal cancer        | 0.39               |
| CC-4  | Colorectal cancer        | 0.1                |
| CC-5  | Colorectal cancer        | 0.15               |
| CC-6  | Colorectal cancer        | 0.12               |
| CC-7  | Colorectal cancer        | 0.19               |
| CC-8  | Colorectal cancer        | 0.39               |
| CC-9  | Colorectal cancer        | 0.47               |
| CC-10 | Colorectal cancer        | 0.26               |
| HCC-1 | Hepatocellular carcinoma | 0.49               |
| HCC-2 | Hepatocellular carcinoma | 0.5                |
| HCC-3 | Hepatocellular carcinoma | 0.26               |
| HCC-4 | Hepatocellular carcinoma | 0.23               |
| HCC-5 | Hepatocellular carcinoma | 0.27               |
| HCC-6 | Hepatocellular carcinoma | 0.35               |

|        |                          |      |
|--------|--------------------------|------|
| HCC-7  | Hepatocellular carcinoma | 0.39 |
| HCC-8  | Hepatocellular carcinoma | 0.11 |
| HCC-9  | Hepatocellular carcinoma | 0.16 |
| HCC-10 | Hepatocellular carcinoma | 0.1  |

Table S-3. Specicity test of the Ct value of healthy control serum

| Healthy control | Ct value |
|-----------------|----------|
| N51             | 39.6     |
| N52             | 38.7     |
| N53             | 40       |
| N54             | 39.2     |
| N55             | 38.6     |
| N56             | 40       |
| N57             | 40       |
| N58             | 39.9     |
| N59             | 39       |
| N60             | 40       |
| N61             | 40       |
| N62             | 40       |
| N63             | 39.8     |
| N64             | 40       |
| N65             | 40       |
| N66             | 40       |
| N67             | 39       |
| N68             | 39.4     |
| N69             | 39.7     |
| N70             | 40       |
| N71             | 40       |
| N72             | 40       |
| N73             | 40       |
| N74             | 39.5     |
| N75             | 39.7     |
| N76             | 40       |
| N77             | 40       |
| N78             | 40       |
| N79             | 39.9     |
| N80             | 39.5     |
| N81             | 39.1     |
| N82             | 40       |
| N83             | 40       |
| N84             | 39.5     |
| N85             | 40       |
| N86             | 40       |

|      |      |
|------|------|
| N87  | 40   |
| N88  | 40   |
| N89  | 40   |
| N90  | 39.7 |
| N91  | 39.6 |
| N92  | 39.1 |
| N93  | 40   |
| N94  | 40   |
| N95  | 40   |
| N96  | 40   |
| N97  | 40   |
| N98  | 40   |
| N99  | 40   |
| N100 | 40   |

---
